# Supplementary material for: Biphenyl dioxygenase-catalysed cis-dihydroxylation of tricyclic azaarenes: chemoenzymatic synthesis of arene oxide metabolites and furoquinoline alkaloids
Source: Royal Society of Chemistry journal article supplement (doi:10.1039/c3ra42026d), 2013-01-01
Supplement: c3ra42026d.pdf [file c3ra42026d.pdf]

## Electronic Supplementary Information

### **Biphenyl dioxygenase-catalysed *cis*-dihydroxylation of tricyclic azaarenes: chemoenzymatic synthesis of arene oxide metabolites and furoquinoline alkaloids**

**Derek R. Boyd, Narain D. Sharma, Jonathan G. Carroll, Pui L. Loke, Colin R. O'Dowd and Christopher C. R. Allen**

*School of Chemistry and Chemical Engineering, School of Biological Sciences,*

*Queen's University of Belfast, Belfast BT9 5AG, UK.*

dr.boyd@qub.ac.uk

## Index

### **NMR Spectra of acridine and dictamnine metabolites and derivatives**

|                                             |           |
|---------------------------------------------|-----------|
| Copy of <sup>1</sup> H spectrum of compound | <b>2</b>  |
| Copy of <sup>1</sup> H spectrum of compound | <b>4</b>  |
| Copy of <sup>1</sup> H spectrum of compound | <b>5</b>  |
| Copy of <sup>1</sup> H spectrum of compound | <b>6</b>  |
| Copy of <sup>1</sup> H spectrum of compound | <b>14</b> |
| Copy of <sup>1</sup> H spectrum of compound | <b>16</b> |
| Copy of <sup>1</sup> H spectrum of compound | <b>17</b> |
| Copy of <sup>1</sup> H spectrum of compound | <b>23</b> |
| Copy of <sup>1</sup> H spectrum of compound | <b>27</b> |
| Copy of <sup>1</sup> H spectrum of compound | <b>29</b> |

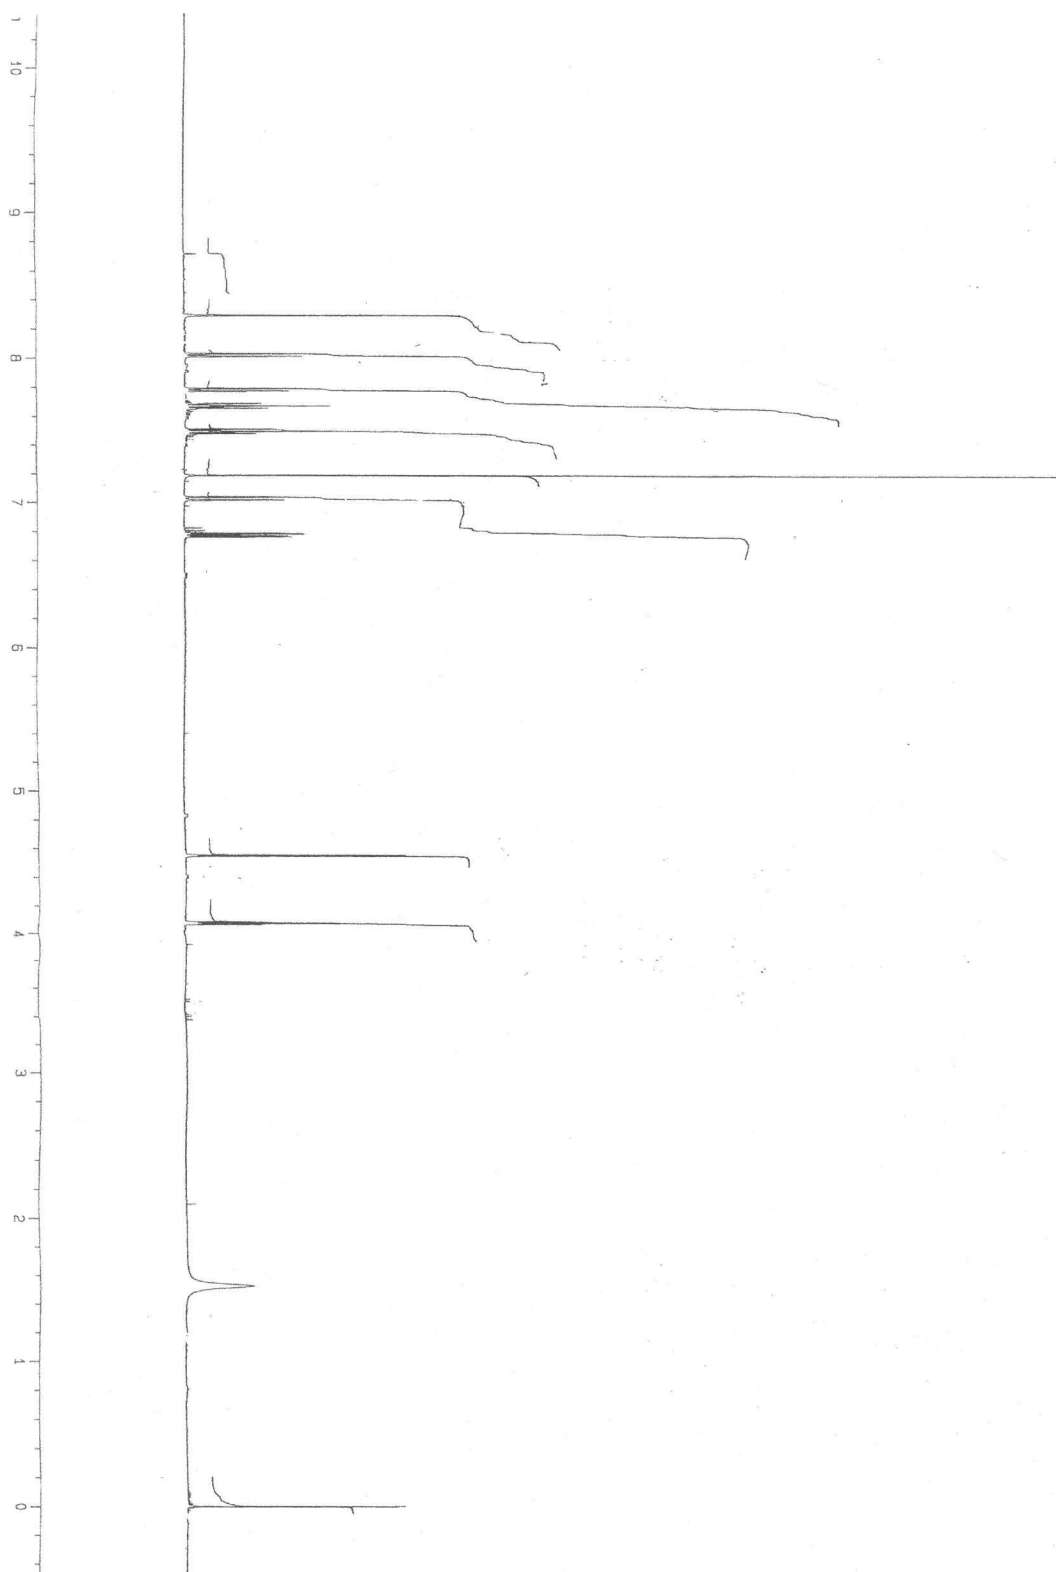

| Current Data Parameters     |                |
|-----------------------------|----------------|
| NAME                        | SCR100         |
| PROBNO                      | 20             |
| PROBNO                      | 1              |
| F2 - Acquisition Parameters |                |
| Pris-                       | 950624         |
| INSTR                       | drift01        |
| PROBNO                      | 5 mm Out1.HI   |
| PULPROG                     | zgpg30         |
| TD                          | 2830           |
| DELTA                       | 65565          |
| SOLVENT                     | CDCl3          |
| DS                          | 4              |
| SWH                         | 7501.507 Hz    |
| F2 F1 F2                    | 0.01465 Hz     |
| Acq                         | 4.156475 sec   |
| RG                          | 65.650 usec    |
| DM                          | 68.870 usec    |
| DE                          | 7.11 usec      |
| TE                          | 300.0 K        |
| D1                          | 2.000000 sec   |
| D11                         | 0.00 usec      |
| DELTA                       | 7.000000 sec   |
| SFO1                        | 500.135070 MHz |
| MU1                         | 1H             |
| PL1                         | -3.00 dB       |
| F3 - Processing Parameters  |                |
| SI                          | 32768          |
| SF                          | 500.135060 MHz |
| MDW                         | EW             |
| SSS                         | 0.00 Hz        |
| LB                          | 0.00 Hz        |
| GB                          | 0.00 Hz        |
| PC                          | 1.00           |
| 10 NMR plot parameters      |                |
| IX                          | 33.00 cm       |
| FY                          | 33.00 cm       |
| FZ                          | 5251.37 Hz     |
| F2p                         | -0.000 gpm     |
| F2                          | -250.07 Hz     |
| PRICH                       | 0.33333 pps/cd |
| PRICH                       | 160.171 Hz/cd  |

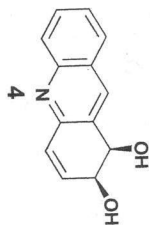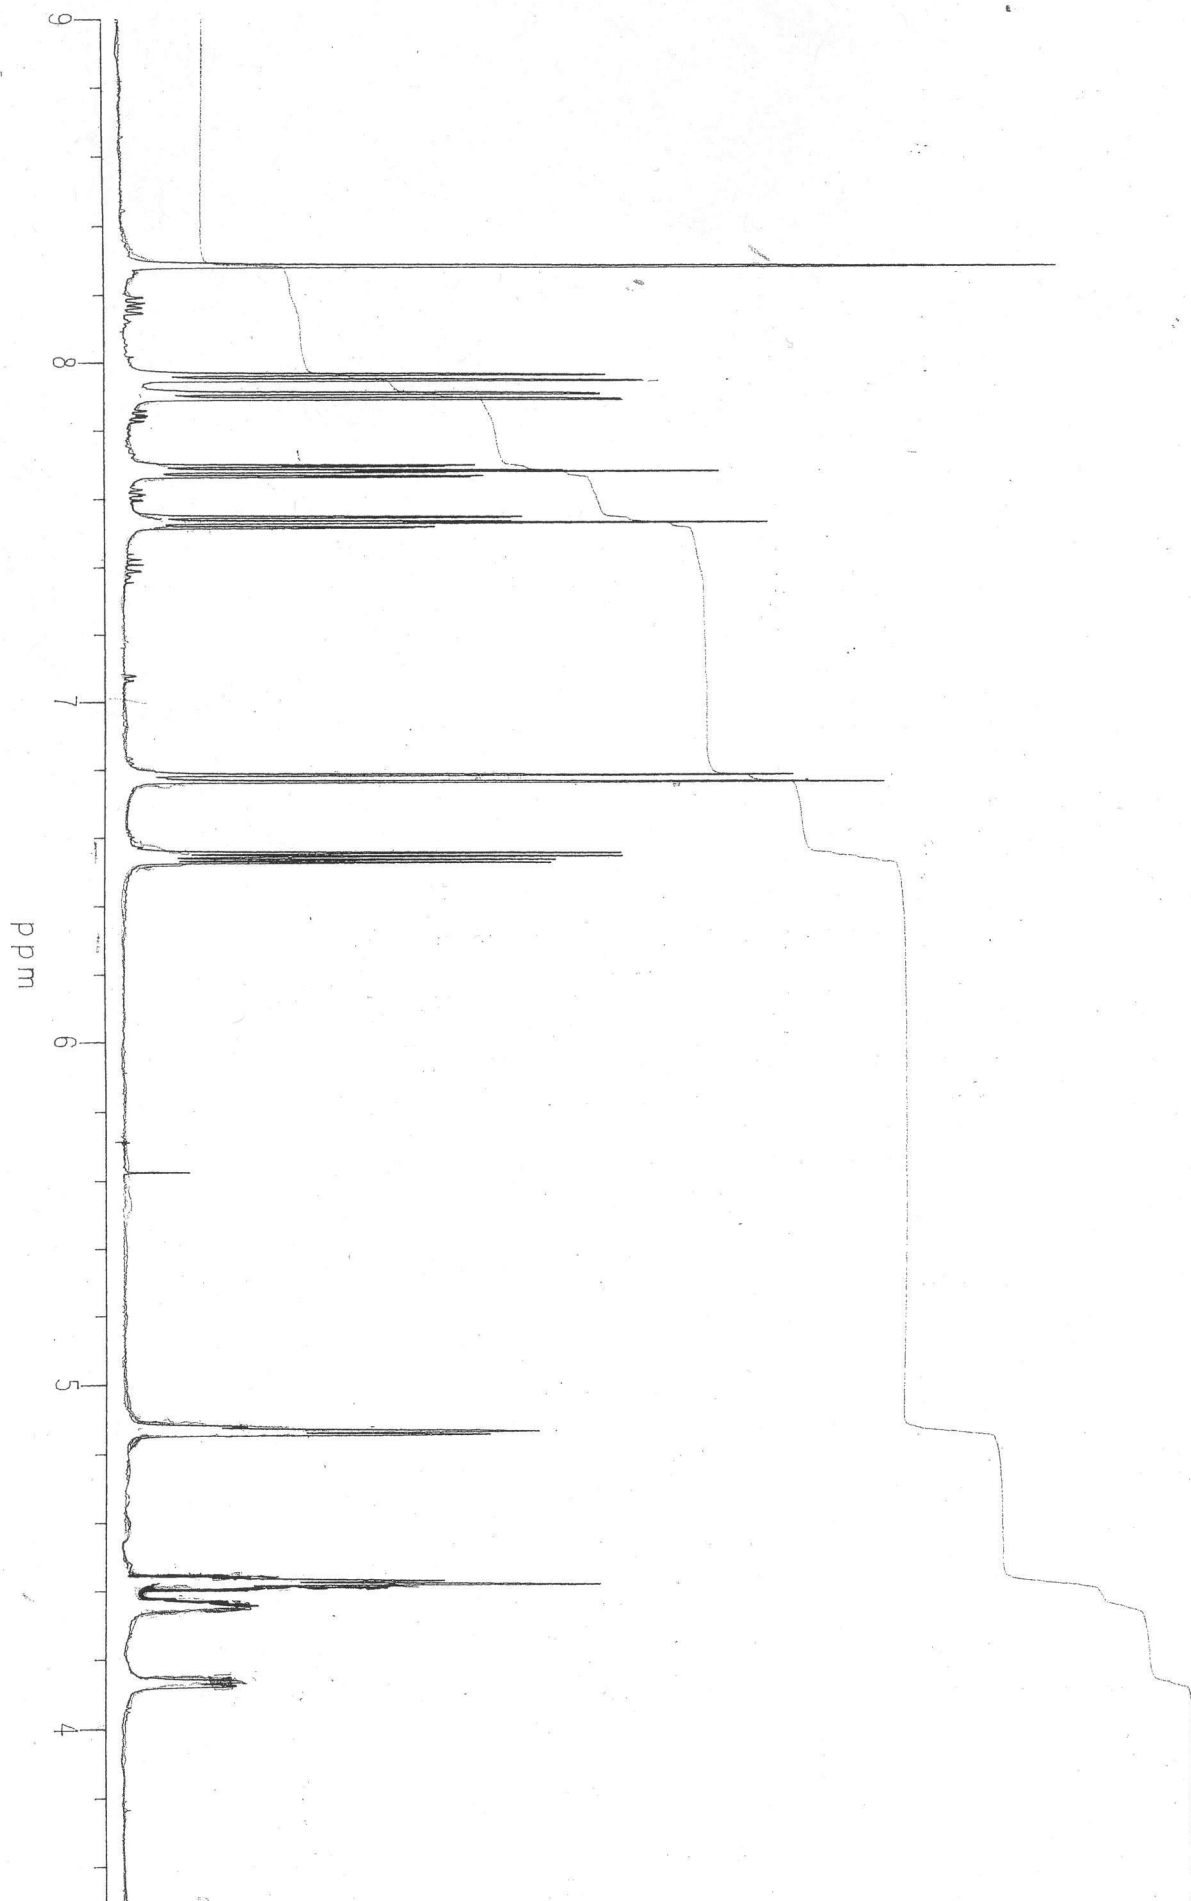

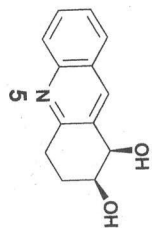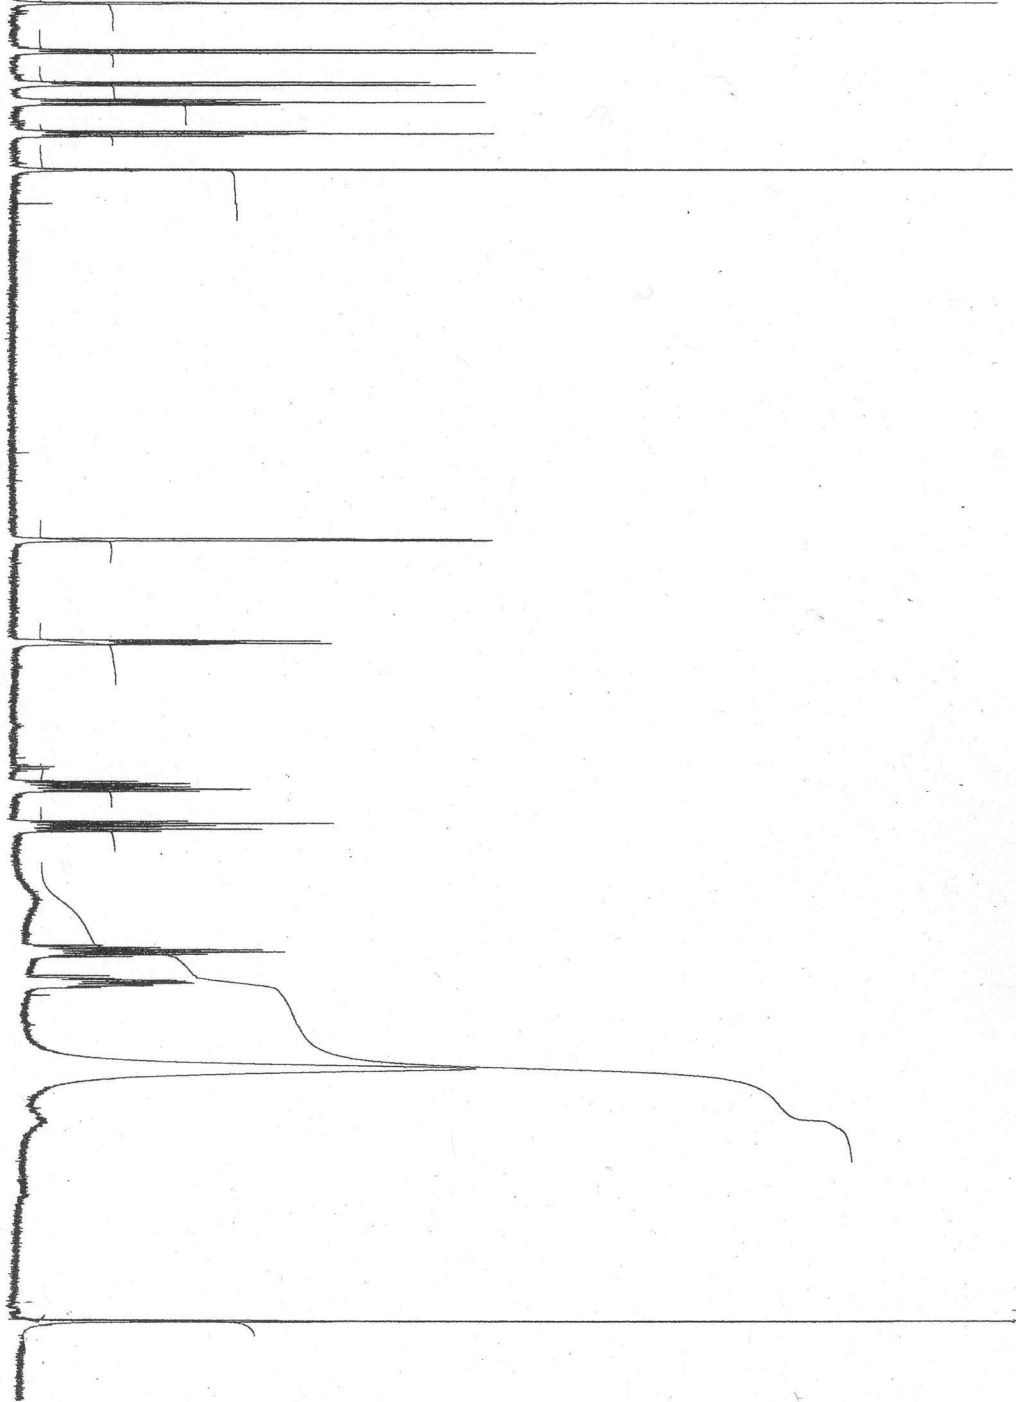

| Current Data Parameters |       |
|-------------------------|-------|
| NAME                    | acthd |
| EXPNO                   | 10    |
| PROCNO                  | 1     |

| F2 - Acquisition Parameters |                 |
|-----------------------------|-----------------|
| Date_                       | 30/05/13        |
| Time                        | 12.00           |
| INSTRUM                     | 5 mm Dui3 1H    |
| PROBHD                      | 4mm500          |
| PULPROG                     | zgpg30          |
| TD                          | 65536           |
| SOLVENT                     | CDCl3           |
| NS                          | 32              |
| DS                          | 4               |
| SWH                         | 7607.507 Hz     |
| FIDRES                      | 0.114955 Hz     |
| AQ                          | 4.3647475 sec   |
| RG                          | 512.7           |
| DM                          | 66.600 usec     |
| DE                          | 7.11 usec       |
| TE                          | 300.0 K         |
| D1                          | 2.0000000 sec   |
| P1                          | 6.00 usec       |
| DE                          | 7.11 usec       |
| SFO1                        | 500.1327507 MHz |
| NUC1                        | 1H              |
| PL1                         | -3.00 dB        |

| F2 - Processing Parameters |                 |
|----------------------------|-----------------|
| SI                         | 32768           |
| SF                         | 500.1300134 MHz |
| WDW                        | EM              |
| SSB                        | 0               |
| LB                         | 0.00 Hz         |
| GB                         | 0               |
| PC                         | 1.00            |

| 1D NMR plot parameters |                 |
|------------------------|-----------------|
| CX                     | 33.00 cm        |
| F1P                    | 10.500 ppm      |
| F1                     | 5251.37 Hz      |
| F2P                    | -250.07 Hz      |
| F2                     | 0.33333 ppm/cm  |
| PRMCH                  | 166.71001 Hz/cm |

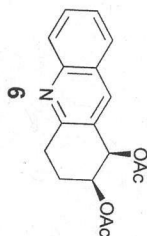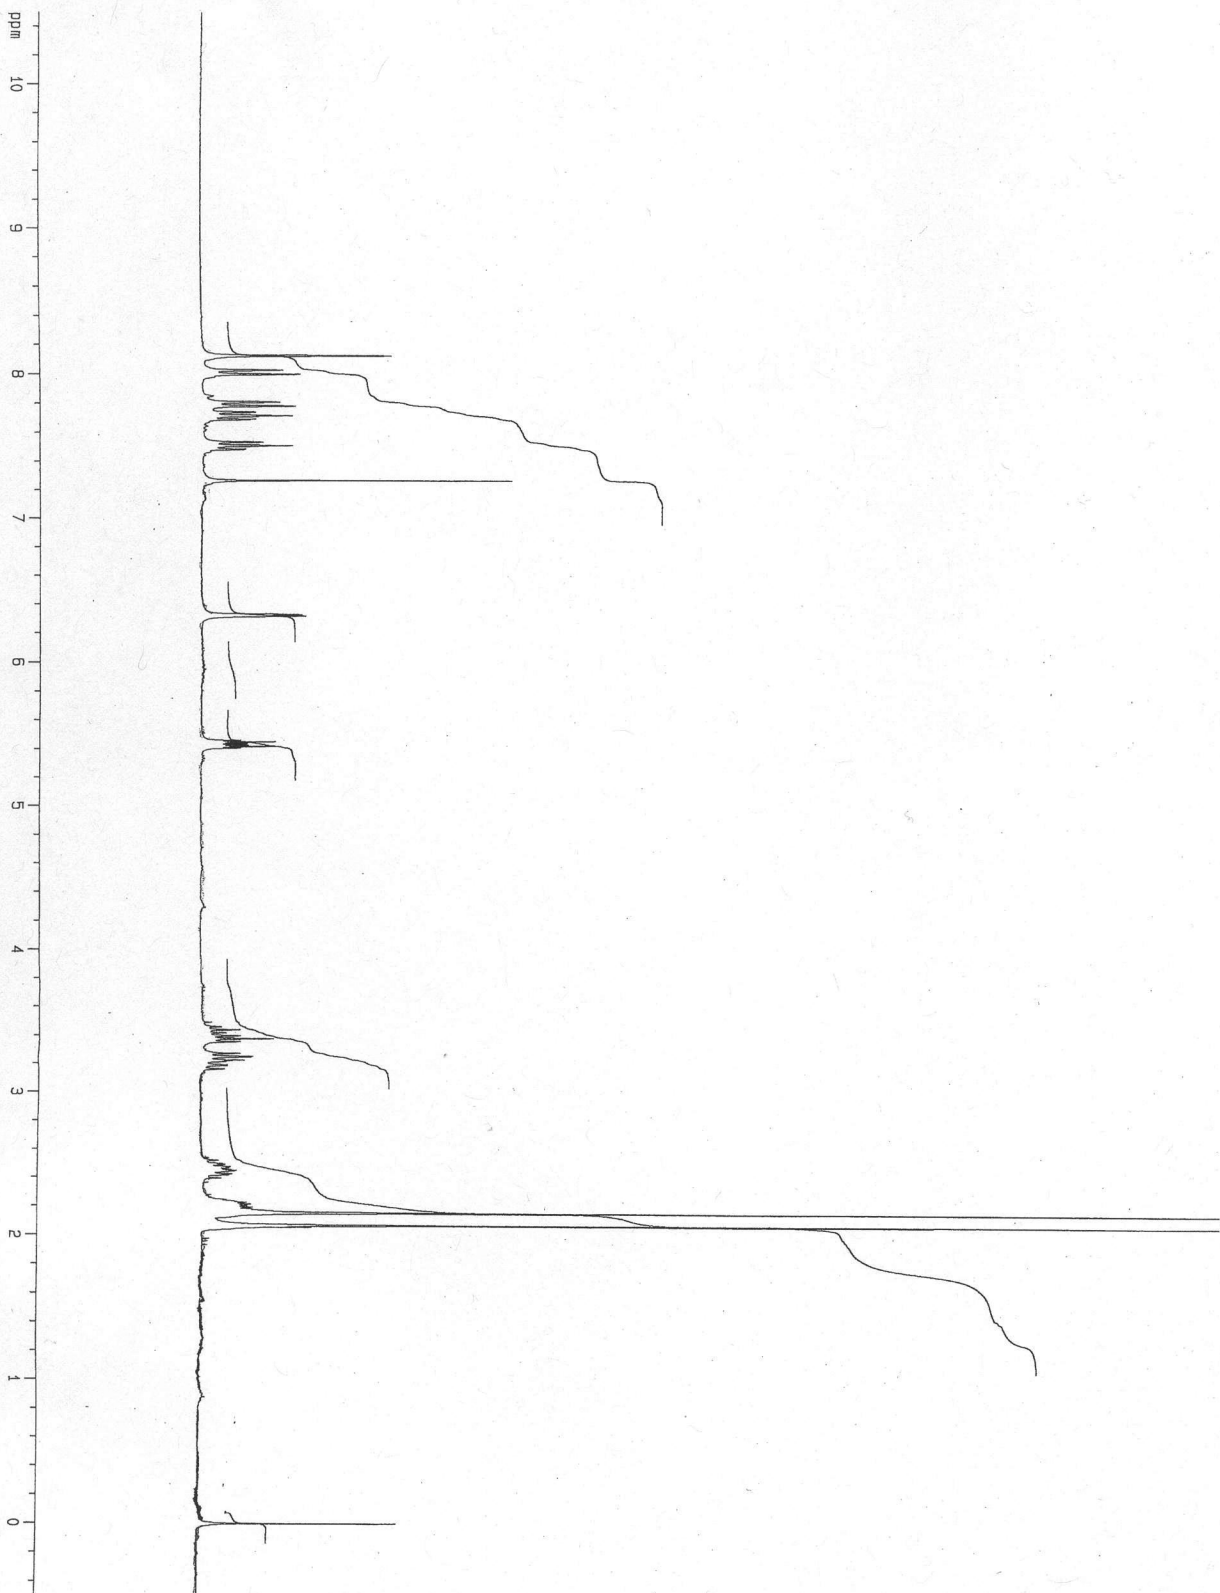

Current Data Parameters  
 Name: 6  
 EXPNO: 10  
 PROCNO: 1  
 F2 - Acquisition Parameters  
 Date\_: 990701  
 Time: 11.46  
 INSTRUM: dpx300  
 PROBHD: 5 mm QNP 1H  
 PULPROG: zgpg30  
 TO: 2930  
 SOLVENT: CDCl3  
 NS: 327  
 DS: 4  
 SWH: 4789.272 Hz  
 FIDRES: 0.146157 Hz  
 AQ: 3.4210294 sec  
 RG: 382  
 DW: 104.400 usec  
 DE: 5.50 usec  
 TE: 300.0 K  
 D1: 1.00000000 sec  
 P1: 10.80 usec  
 DE: 5.50 usec  
 SFO1: 300.018001 MHz  
 NUC1: 1H  
 PC1: -6.00 dB  
 F2 - Processing parameters  
 SI: 16384  
 SF: 300.0100067 MHz  
 MDW: EN  
 SSB: 0  
 LB: 0.30 Hz  
 SB: 0  
 PC: 1.00  
 1D NMR plot parameters  
 CX: 30.00 cm  
 CZ: 30.00 cm  
 F1P: 100.500 MHz  
 F2P: 300.000 MHz  
 F3P: -190.01 MHz  
 PPMCH: 0.38657 ppm/cm  
 HZCM: 110.00357 Hz/cm

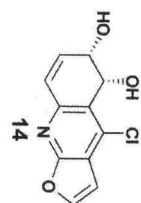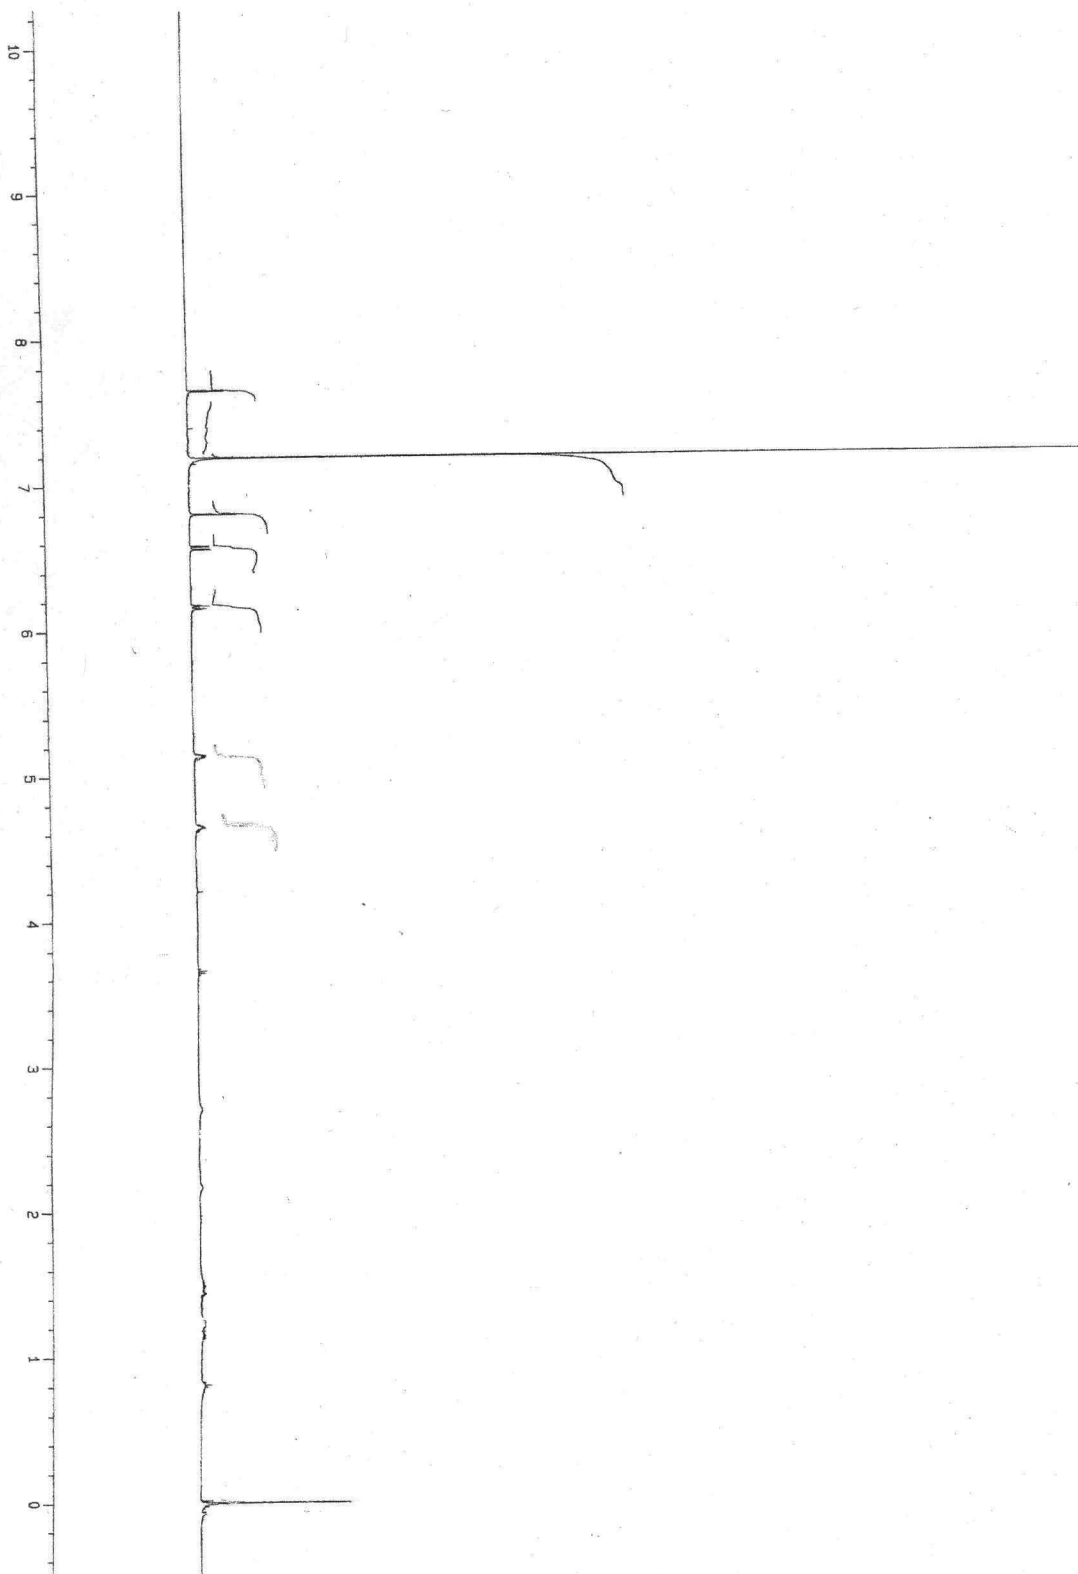

Current Data Parameters  
EXPNO 2  
PROCNO 1  
F2 - Acquisition Parameters  
Date\_ 07/04/15  
Time 14:51  
INSTRUM spect  
PROBHD 5 mm MSL100  
PULPROG zgpg30  
TD 65536  
SOLVENT CDCl3  
NS 64  
DS 4  
SWH 6892.806 Hz  
AQ 0.274439 Hz  
RG 327.14  
FIDRES 1.821908 sec  
AQ 0.274439 Hz  
RG 327.14  
TE 300.0 K  
D1 1.0000000 sec  
P1 10.00 usec  
DE 7.11 usec  
SFO1 500.136298 MHz  
NUC1 1H  
P11 -3.00 dB  
F2 - Processing parameters  
SI 32768  
SF 500.136298 MHz  
NMQ 64  
EN 1  
SFO 500.136298 MHz  
NUC 1H  
P1 10.00 usec  
PC 1.00  
D1 1.00  
F2 - NMR plot parameters  
CX 32.00 cm  
ZP 1.00 cm  
F1 4501.37 Hz  
F2 -250.07 Hz  
P1 0.33333 sec/cm  
H2CM 100.7100 Hz/cm



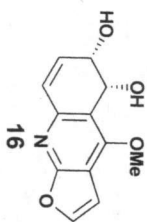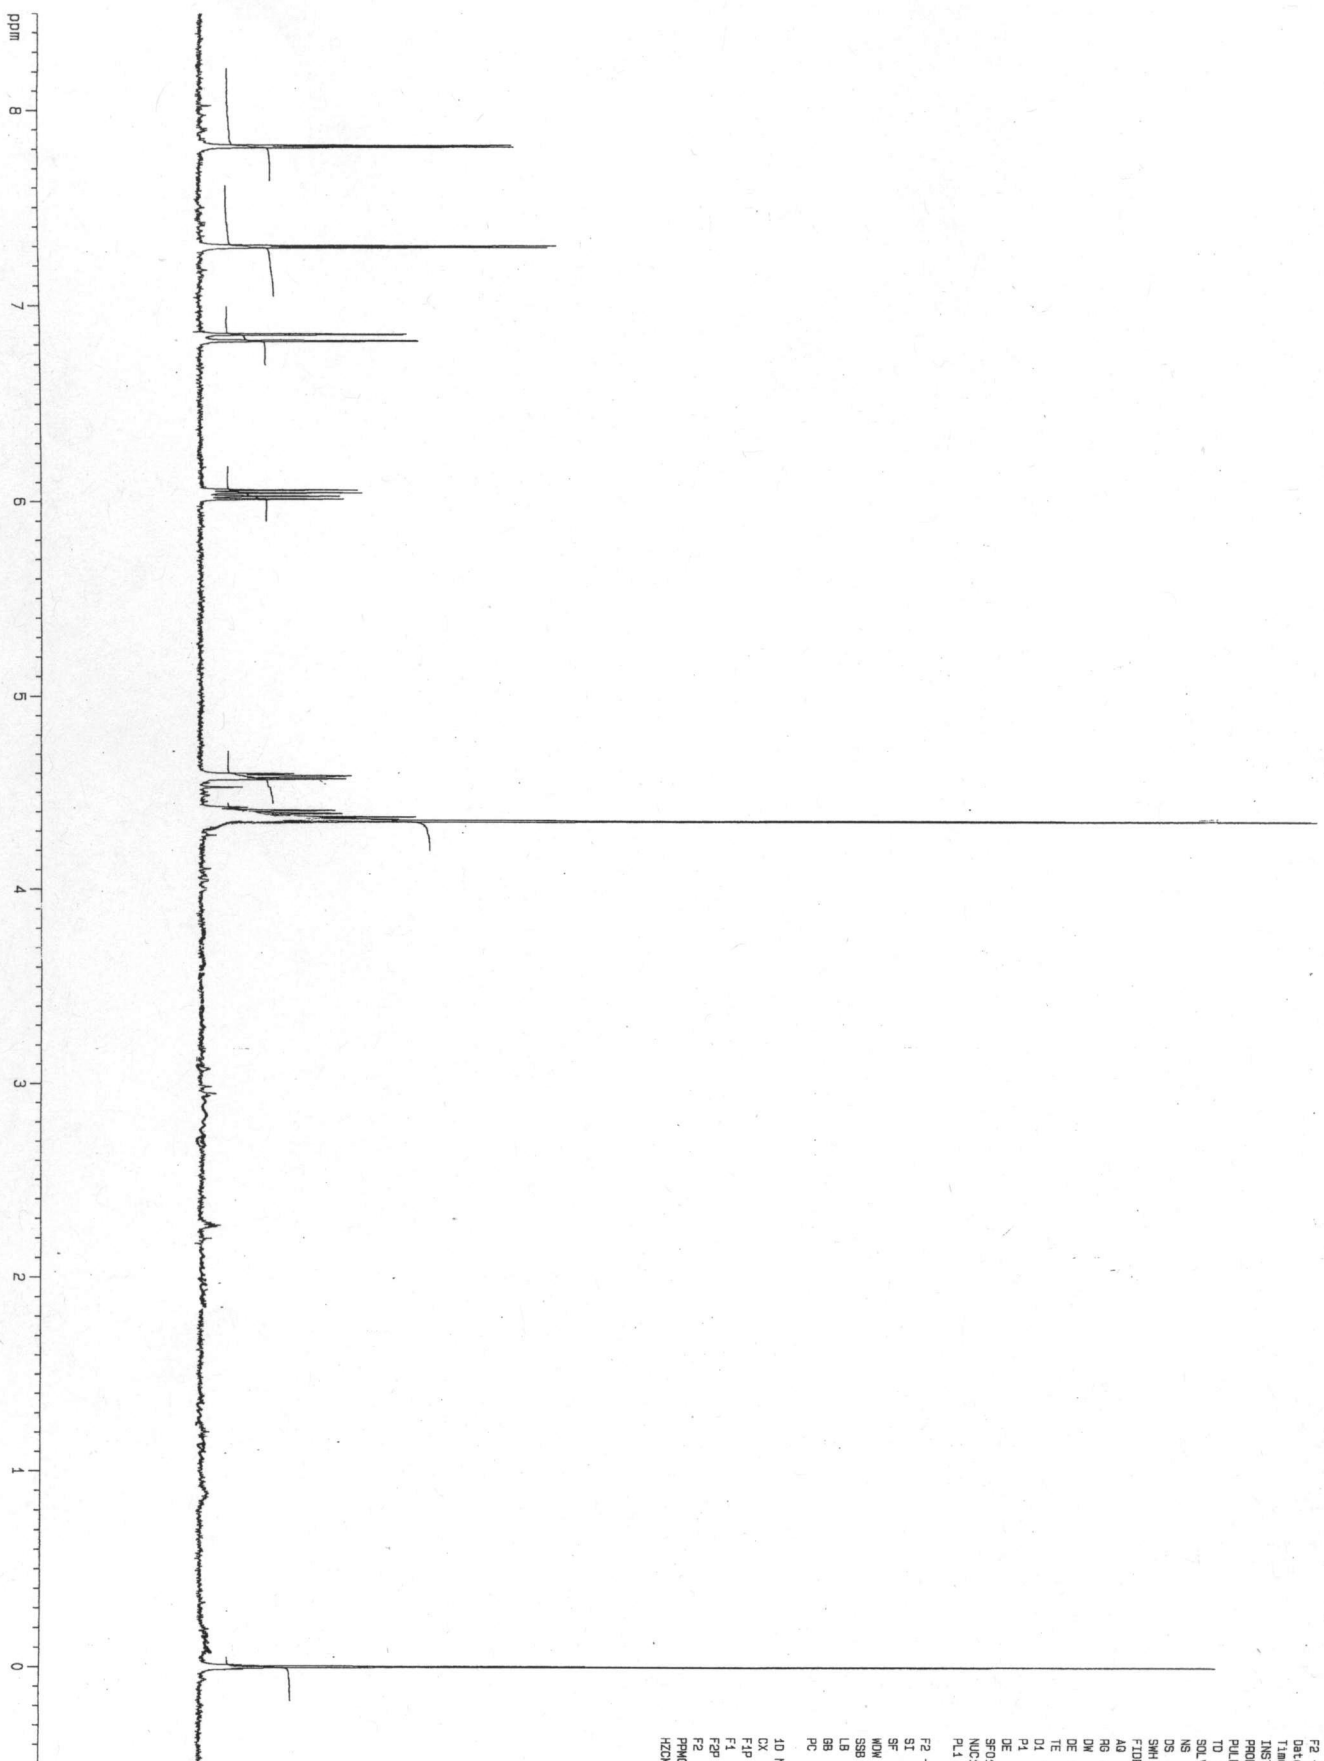

Current Data Parameters  
NAME dictd1011  
EXPNO 10  
PROCNO 1

F2 - Acquisition Parameters  
Date\_ 961203  
Time 11.50  
INSTRUM dpv300  
PROBHD 5 mm QNP 1H  
PULPROG zg30  
TD 32768  
SOLVENT Aceton  
NS 8  
DS 0  
SWH 5341.880 Hz  
FIDRES 0.163021 Hz  
AQ 3.0671349 sec  
RG 812.7  
DE 93.600 usec  
TE 300.0 K  
D1 1.00000000 sec  
P1 10.80 usec  
DE 5.50 usec  
SF01 300.0120673 MHz  
NUC1 1H  
PL1 -6.00 dB

F2 - Processing parameters  
SI 16384  
SF 300.0100074 MHz  
WDW EM  
SSB 0  
LB 0.30 Hz  
GB 0  
PC 1.00

10 MHz plot parameters  
CX 33.00 cm  
F1P 8.500 ppm  
F1 2550.08 Hz  
F2P -0.500 ppm  
F2 -150.04 Hz  
PRNCH 0.27273 ppm/cm  
HZCH 81.82092 Hz/cm

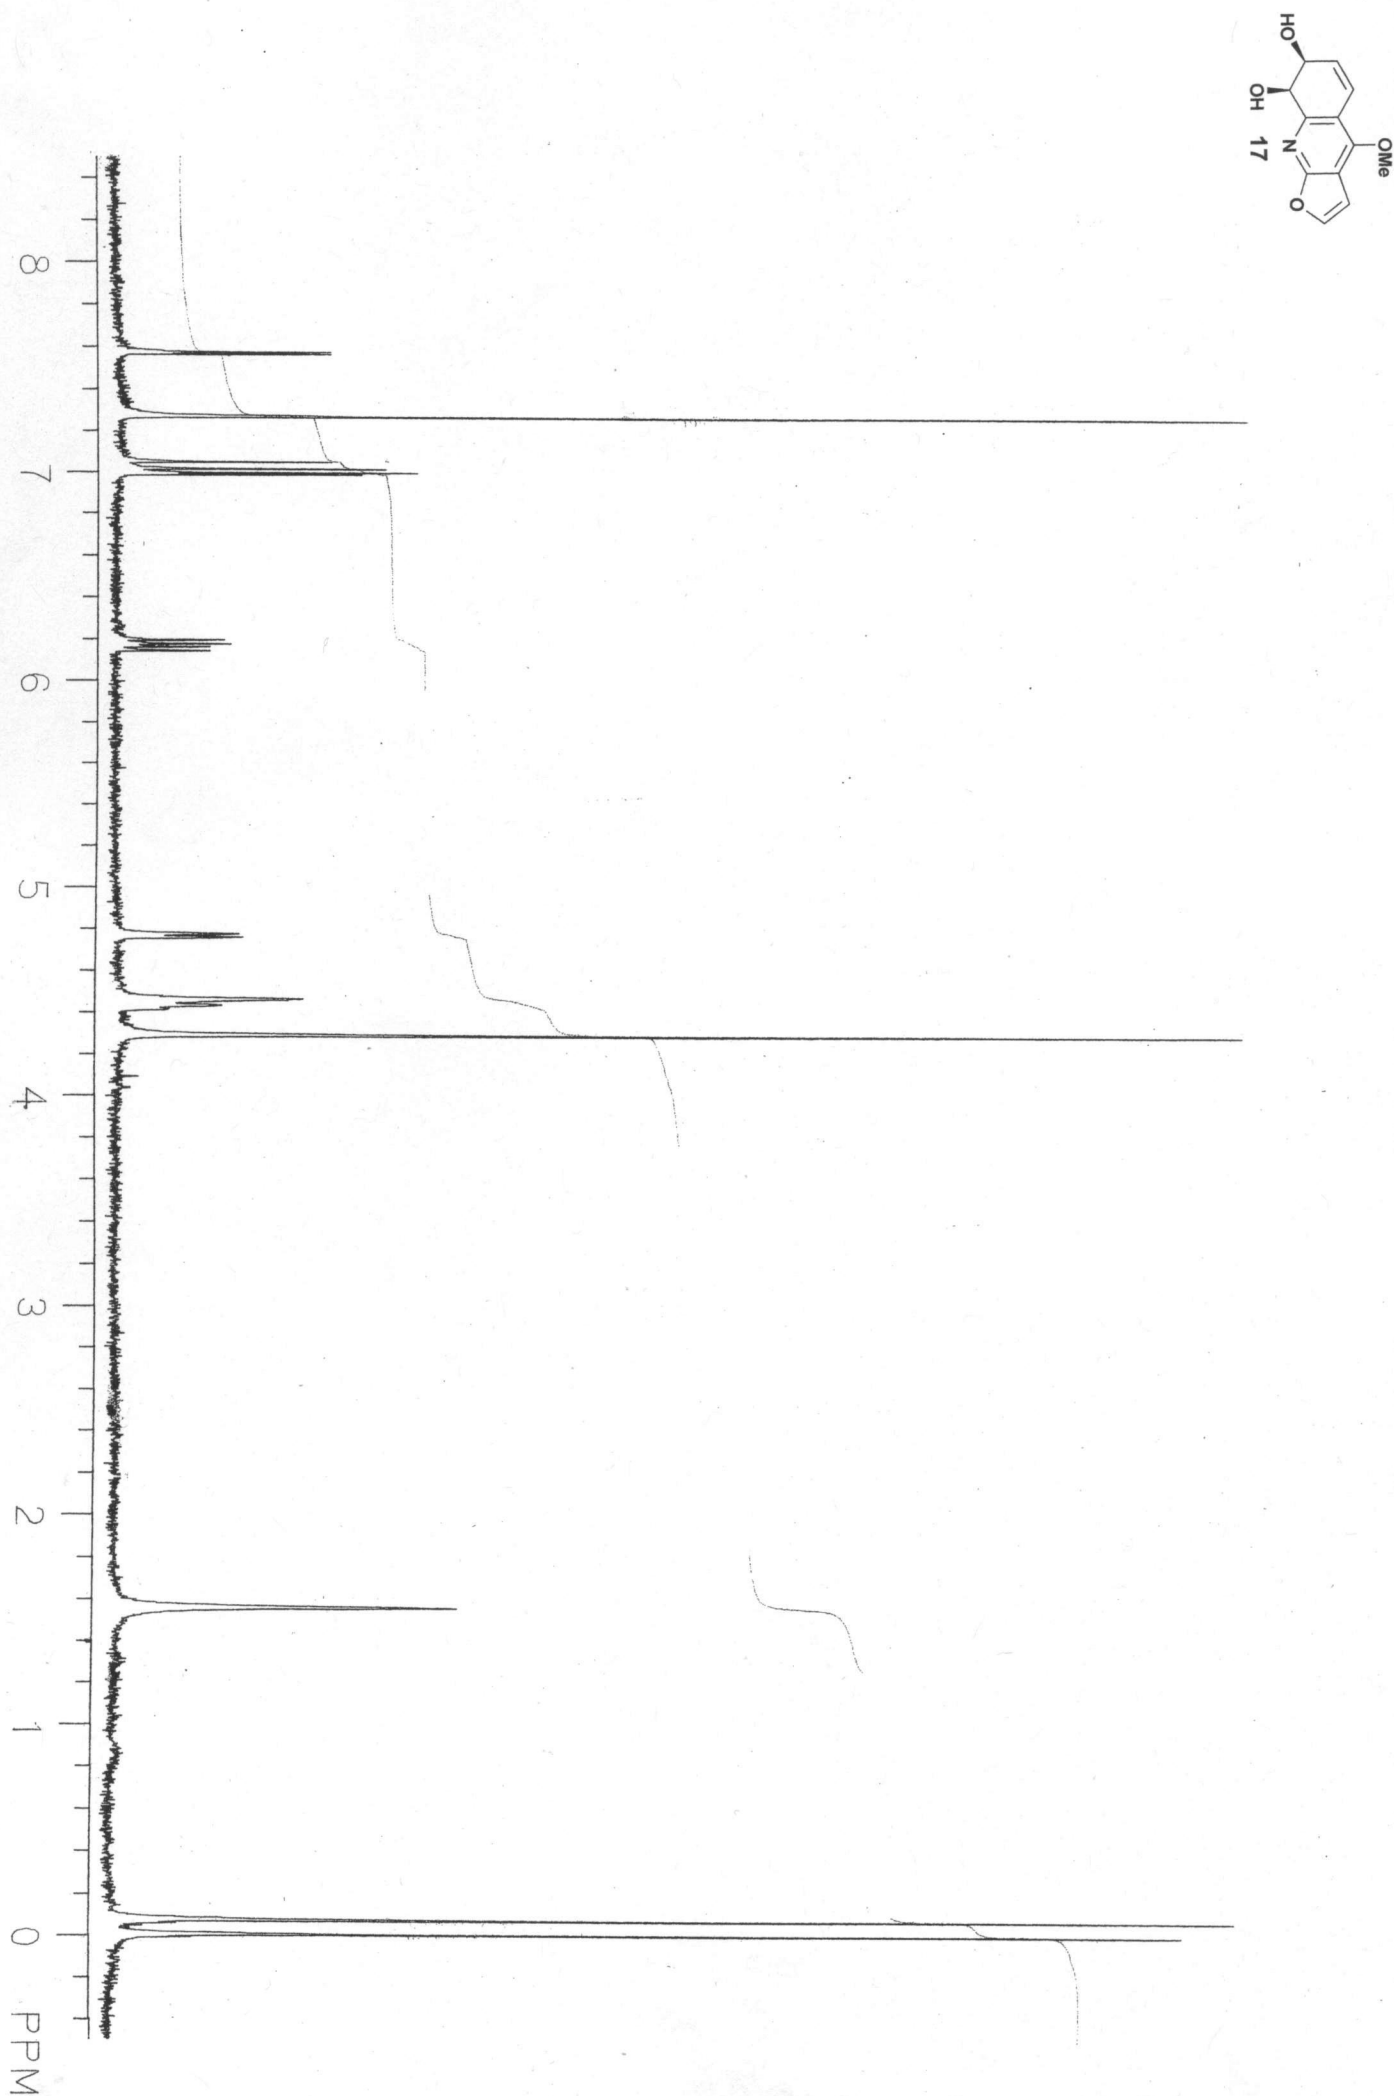



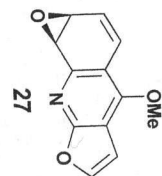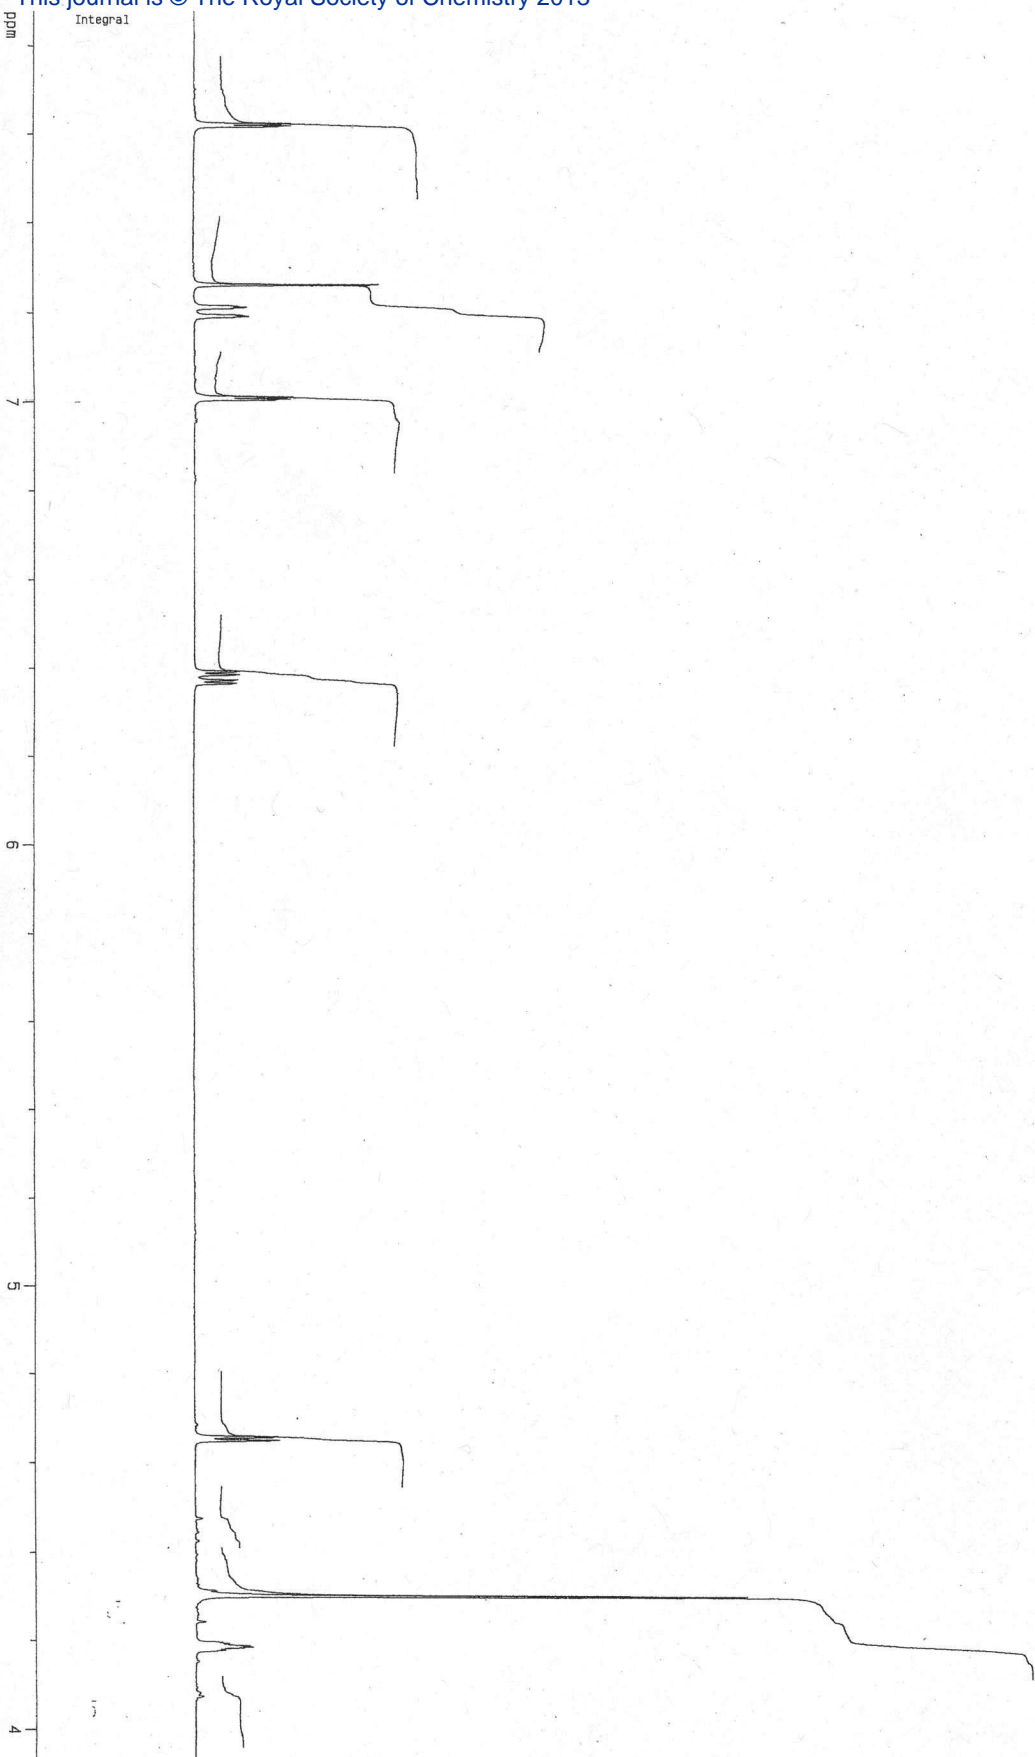

Current Data Parameters  
NAME dltcpx  
EXPNO 10  
PROCNO 1

F2 - Acquisition Parameters  
Date\_ 20120323  
Time 14:13  
INSTRUM spect  
PROBHD 5 mm QNP 1H  
PULPROG zgpg30  
TD 65536  
FIDRES 0.114555 Hz  
AQ 4.364775 sec  
RG 256  
DM 65.500 usec  
DE 7.11 usec  
TE 300.0 K

F2 - Processing parameters  
SI 32768  
SF 500.130013 MHz  
WDW EM  
SSB 0  
LB 0.00 Hz  
GB 0  
PC 1.00

1D NMR plot parameters  
CX 33.00 cm  
F1P 7.879 ppm  
F1 3940.44 Hz  
F2P 3.928 ppm  
F2 1964.35 Hz  
PNUCK 0.11973 ppm/cm  
HZCK 59.95140 Hz/cm

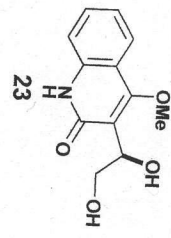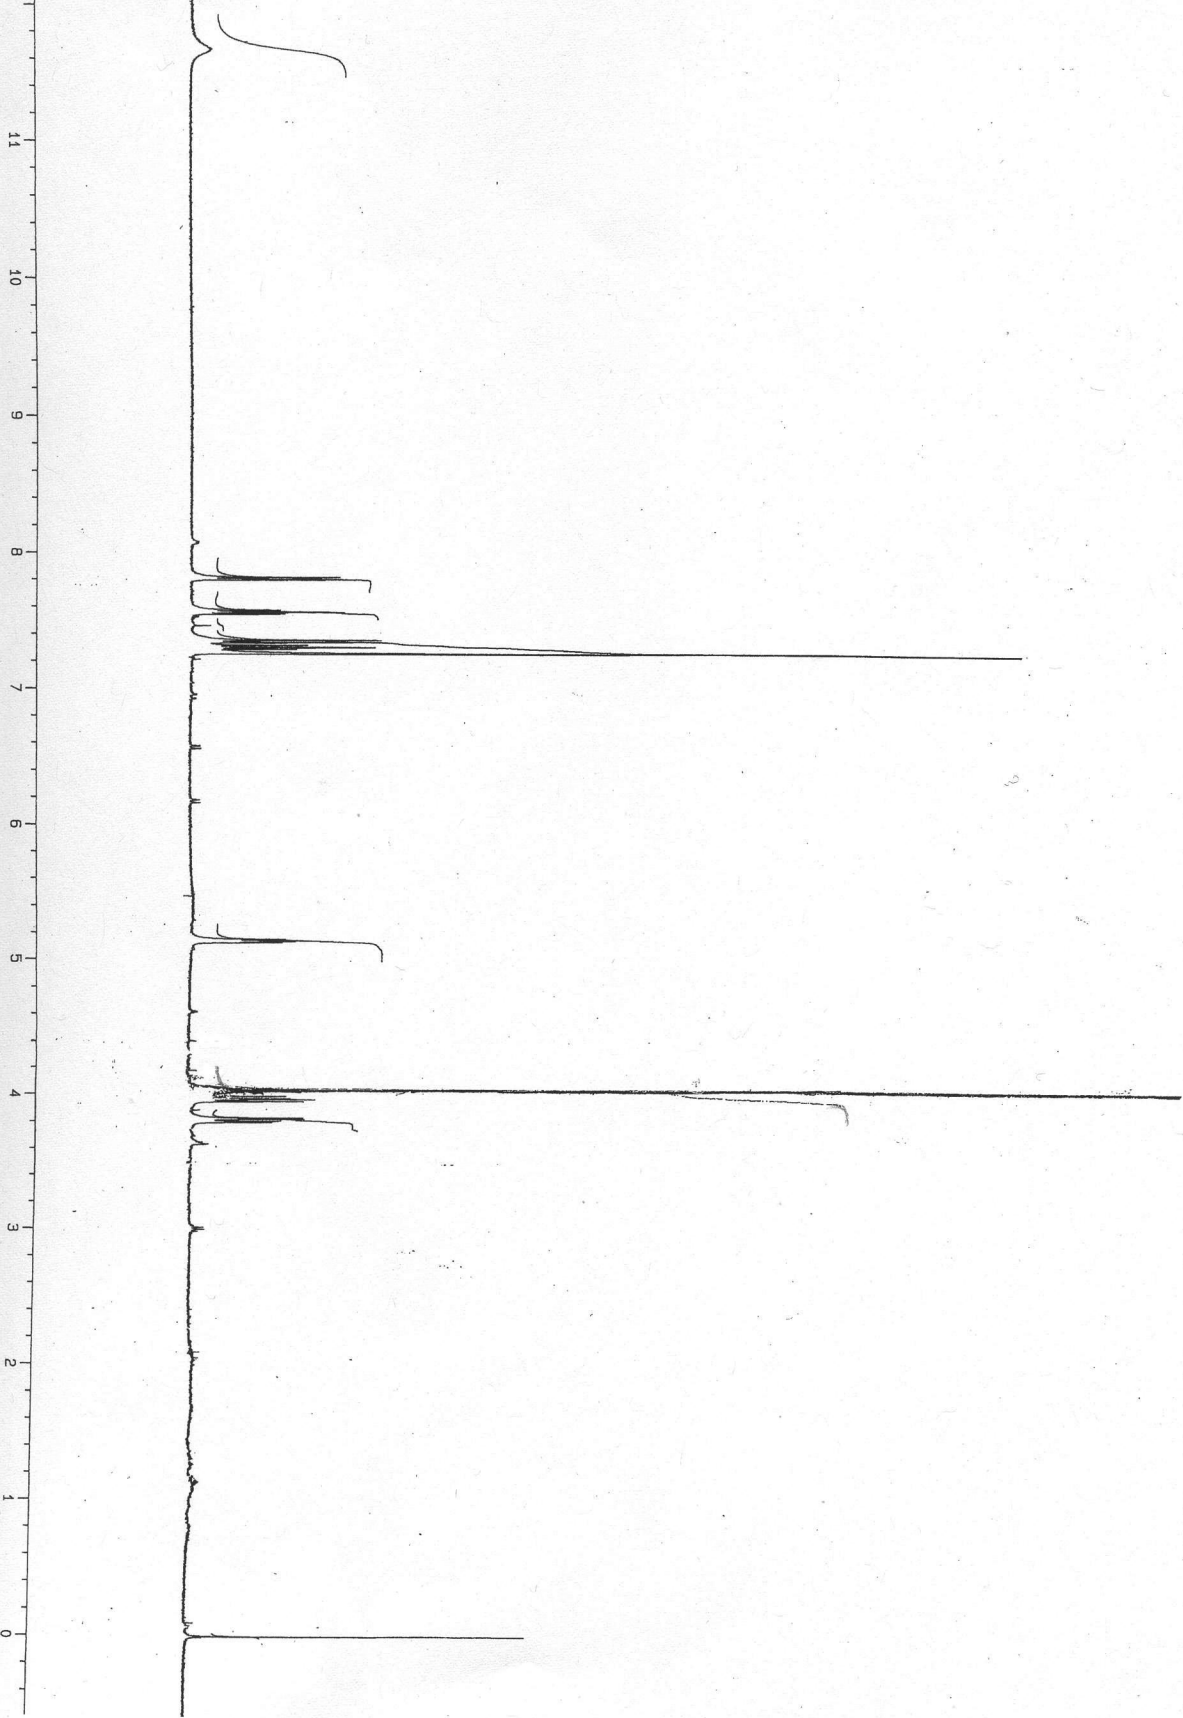

| Current Data Parameters     |                 |  |
|-----------------------------|-----------------|--|
| NAME                        | dictacid        |  |
| EXPNO                       | 20              |  |
| PROCNO                      | 1               |  |
| F2 - Acquisition Parameters |                 |  |
| Date_                       | 981118          |  |
| Time                        | 10.52           |  |
| INSTRUM                     | drx500          |  |
| PROBHD                      | 5 mm MSLTNU     |  |
| PULPROG                     | zgpg30          |  |
| TD                          | 65536           |  |
| SOLVENT                     | CDCl3           |  |
| NS                          | 32              |  |
| DS                          | 4               |  |
| SWH                         | 7507.507 Hz     |  |
| FIDRES                      | 0.11455 Hz      |  |
| AQ                          | 4.364735 sec    |  |
| RG                          | 574.7           |  |
| DM                          | 66.600 usec     |  |
| DE                          | 7.11 usec       |  |
| TE                          | 300.0 K         |  |
| D1                          | 2.00000000 sec  |  |
| P1                          | 10.00 usec      |  |
| DE                          | 7.11 usec       |  |
| SFO1                        | 500.1327507 MHz |  |
| F2 - Processing parameters  |                 |  |
| SI                          | 32768           |  |
| SF                          | 500.1300121 MHz |  |
| MDM                         | EN              |  |
| SSB                         | 0               |  |
| LB                          | 0.00 Hz         |  |
| GB                          | 0               |  |
| PC                          | 1.00            |  |
| 1D NMR plot parameters      |                 |  |
| CX                          | 33.00 cm        |  |
| F1P                         | 12.358 ppm      |  |
| F1                          | 6159.18 Hz      |  |
| F2P                         | -0.589 ppm      |  |
| F2                          | -294.24 Hz      |  |
| PPM0                        | 0.39182 ppm/cm  |  |
| HZCM                        | 195.85111 Hz/cm |  |

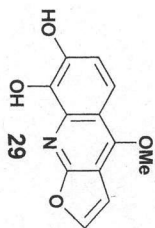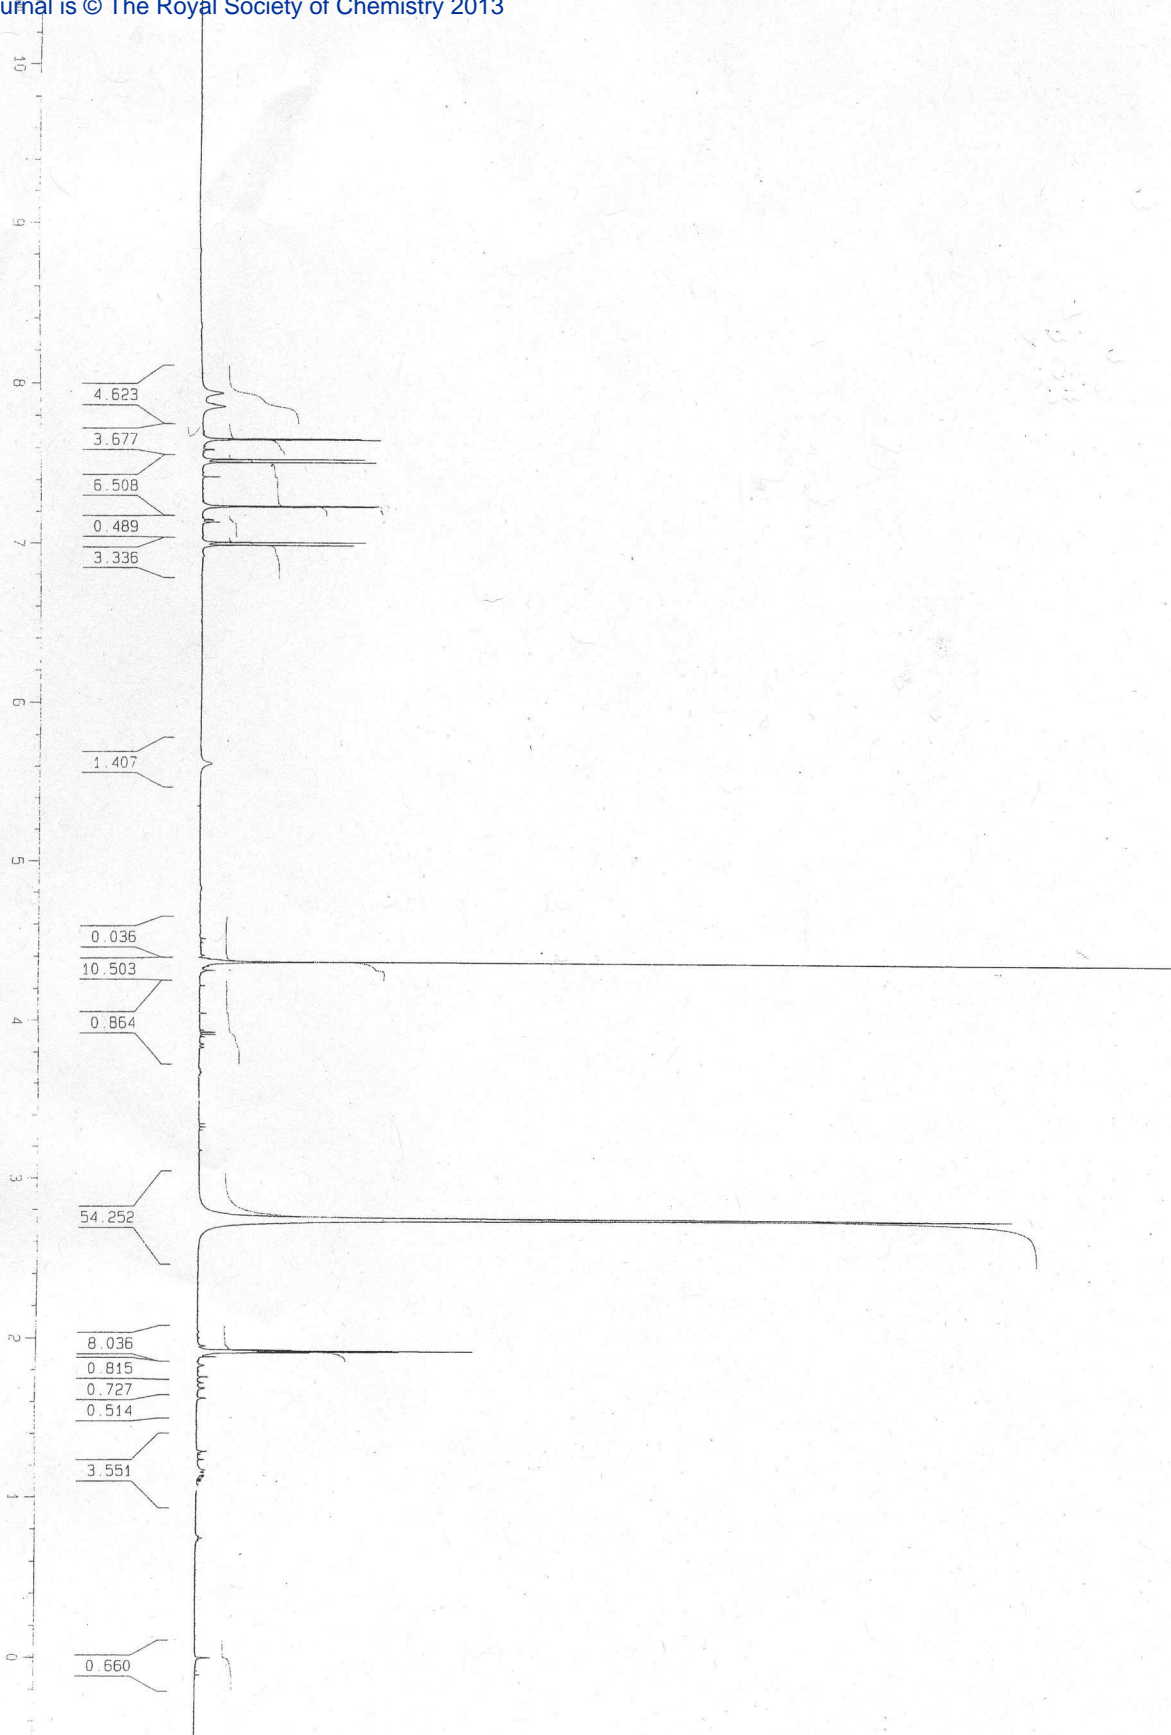

Current Data Parameters  
NAME PL-11-91A  
EXPNO 10  
PROCNO 1  
F2 - Acquisition Parameters  
Date\_ 20010131  
Time 12.33  
INSTRUM drx500  
PROBHD 5 mm Multinu  
PULPROG zgpg30  
NUC1 13C  
SOLVENT Aceton  
NS 16  
DS 16  
SWH 7507.507 Hz  
FIDRES 0.114555 Hz  
AQ 4.364775 sec  
RG 181  
RG 66.600 usec  
DE 7.11 usec  
TE 300.0 K  
D1 1.00000000 sec  
===== CHANNEL f1 =====  
NUC1 1H  
P1 10.00 usec  
PL 0.00 dB  
SFO1 500.1362507 MHz  
F2 - Processing parameters  
SI 32768  
SF 500.1360749 MHz  
WDW EM  
SSB 0  
LB 0.00 Hz  
GB 0  
PC 1.00  
F2 - NMR plot parameters  
CV 16380.00 cm  
F1P 10.500 cm  
F1 5251.37 Hz  
F2P -250.07 Hz  
F2 0.3333 ppm/cm  
HZCM 166.71002 Hz/cm
